# Supplementary material for: Online eLearning for undergraduates in health professions: A systematic review of the impact on knowledge, skills, attitudes and satisfaction
Source: J Glob Health. 2014 Jun;4(1):010406. doi: 10.7189/jogh.04.010406 (PMC4073252; doi:10.7189/jogh.04.010406)
Supplement: Online Supplementary Document [file jogh-04-010406-s001.pdf]

## Online Supplementary Document

George et al. Online eLearning for undergraduates in health professions: A systematic review of the impact on knowledge, skills, attitudes and satisfaction  
J Glob Health 2014;4:010406

---

### 1: Definition of the six eLearning categories

Six broad categories of eLearning interventions, based on the technologies employed. The categories were defined as follows:

- Offline computer-based eLearning: standalone applications where internet or intranet connections are not required for the delivery of the learning activities. The main tasks of the eLearning software in this category are usually performed on a PC or laptop. The delivery channels are usually CD-ROM or USB memory sticks. Alternatively, the delivery mode of the software can be via a networked connection, as long as the learning activities do not rely on this connection.
- Online and local area network-based eLearning: interventions that use the transmission control protocol (TCP) and the internet protocol (IP) to provide the full functionalities of the educational intervention. As implied by the terminology used, the delivery channels are usually the internet or a local area network.
- Psychomotor skills trainer: technology that will develop fine motor coordination skills and techniques in education, such as the precise use of instruments of tools.
- Virtual reality environments: computer-generated representations of a real or artificial environment. This can be interacted with by external involvement, allowing for a first-person active learning experience.
- Digital game-based learning: the application of game principles and mechanics in non-game contexts to engage users in solving problems and improve their engagement, attitudes, motivation and knowledge.
- mLearning: any eLearning intervention that uses handheld, mobile devices to deliver educational content such as a mobile phone, iPod or tablet.

## **2: Fields included in the data extraction form**

### **1. Study ID**

2.1. Journal where the study was published

2.2. Type of publication

2.3. Authors' affiliation

3.1. Study design as specified in the report

3.2. Study aims & objectives

3.3. Countries where the study was conducted

3.4. WHO region

3.5. World Bank income category

3.6. Study start date

3.7. Study end date

3.8. Method of comparison

4.1. Total number of participants invited to take part in the study

4.2. Total number of participants who agreed to take part in the study

4.3. Total number of participants meeting the inclusion criteria for participation in the study

4.4. Total number of participants included in the study

4.5. If cluster RCT, total number of clusters initially included in the study

4.6. If cluster RCT, total number of clusters randomised

4.7. Inclusion criteria

4.8. Exclusion criteria

5.1. Total number of experimental groups (including the control group)

5.2. Were groups tested for baseline differences?

5.2.1. If there were baseline differences, please specify what the difference was

5.3. Indicate the type of degree or qualification that participants were pursuing

If other, please specify:

5.4. Year of study within the anticipated degree or qualification

5.5. Control group

5.5.1. Total number of participants/clusters allocated to the control group

5.5.2. Mean age (standard deviation) of the participants in the control group

5.5.3. Name of educational intervention used as control

5.5.4. Description of the control condition

5.5.5. Field of study

5.6.6. Exposure to the control condition during the whole study

5.5.7. Total exposure time to the intervention

5.5.8. Type of technology/devices used to deliver the intervention

5.5.9. Delivery approach of the intervention

If other, please specify:

5.5.10. Was the usual delivery mode of the assessment changed?

5.5.11. If yes, please specify

5.5.12. Was the delivery mode of the assessment uniform across all the experimental groups?

5.6. Intervention group I

5.6.1. Total number of participants/clusters allocated to this intervention group.

5.6.2. Mean age (standard deviation) of the participants in this intervention group

5.6.3. Name of educational intervention used in this intervention group

5.6.4. Description of this intervention condition

5.6.5. Field of study

5.6.6. Exposure to this intervention condition during the whole study

5.6.7. Total exposure time to the intervention

5.6.8. Type of technology/devices used to deliver the intervention

5.6.9. Delivery approach of the intervention

If other, please specify:

5.6.10. Was the usual delivery mode of the assessment changed?

5.6.11. If yes, please specify

5.6.12. Was the delivery mode of the assessment uniform across all the experimental groups?

5.7. Intervention group II

5.7.1. Total number of participants/clusters allocated to this intervention group.

5.7.2. Mean age (standard deviation) of the participants in this intervention group

5.7.3. Name of educational intervention used in this intervention group

5.7.4. Description of this intervention condition

5.7.5. Field of study

5.7.6. Exposure to this intervention condition during the whole study

5.7.7. Total exposure time to the intervention

5.7.8. Type of technology/devices used to deliver the intervention

5.7.9. Delivery approach of the intervention

If other, please specify:

5.7.10. Was the usual delivery mode of the assessment changed?

5.7.11. If yes, please specify

5.7.12. Was the delivery mode of the assessment uniform across all the experimental groups?

5.8. Intervention group III

5.8.1. Total number of participants/clusters allocated to this intervention group.

5.8.2. Mean age (standard deviation) of the participants in this intervention group

5.8.3. Name of educational intervention used in this intervention group

5.8.4. Description of this intervention condition

5.8.5. Field of study

5.8.6. Exposure to this intervention condition during the whole study

5.8.7. Total exposure time to the intervention

5.8.8. Type of technology/devices used to deliver the intervention

5.8.9. Delivery approach of the intervention

If other, please specify:

5.8.10. Was the usual delivery mode of the assessment changed?

5.8.11. If yes, please specify

5.8.12. Was the delivery mode of the assessment uniform across all the experimental groups?

If more than 4 intervention groups (including the control group), please copy and paste the relevant cells as needed

6.1. Was 'Knowledge' measured? - If not, please go to section 6.2.

6.1.1. Instrument or measure used to assess knowledge - as specified by the study authors

6.1.2. Is this a validated instrument?

6.2. Were 'Skills' measured? - If not, please go to section 6.3.

6.2.1. Instrument or measure used to assess skills - as specified by the study authors

6.2.2. Is this a validated instrument?

6.3. Were 'Attitudes' measured? - If not, please go to section 6.4.

6.3.1. Instrument or measure used to assess attitudes - as specified by the study authors

6.3.2. Is this a validated instrument?

6.4. Was 'Student satisfaction' measured? - If not, please go to section 6.5.

6.4.1. Instrument or measure used to assess student satisfaction - as specified by the study authors

6.4.2. Is this a validated instrument?

6.5. Was an economic evaluation of the eLearning intervention performed?

6.5.1. Were quantitative indicators like costs, investments, hardware, software, license fees and benefits/savings of the eLearning intervention measured?

6.5.2. Was the urgency of the eLearning intervention (i.e., due to a new regulation or organisational demand) mentioned?

6.5.3. Were qualitative-strategic indicators of the eLearning intervention like quality and performance improvements measured?

6.5.4. Were external factors of the eLearning intervention like synergy effects or economies of scope measured?

6.5.5. Please list any additional economic indicators that were measured

7.1. Selection bias

7.1.1. Random sequence generation

7.1.1.1. Describe the method used to generate the allocation sequence in sufficient detail to allow an assessment of whether it should produce comparable groups

7.1.1.2. Please indicate your judgement

7.1.2. Allocation concealment

7.1.2.1. Describe the method used to conceal the allocation sequence in sufficient detail to determine whether intervention allocations could have been foreseen in advance of, or during, enrolment

7.1.2.2. Please indicate your judgement

7.2. Performance bias

7.2.1. Blinding of participants and personnel

7.2.1.1. Describe all measures used, if any, to blind study participants and personnel from knowledge of which intervention a participant received. Provide any information relating to whether the intended blinding was effective

7.2.1.2. Please indicate your judgement

7.3. Detection bias

### 7.3.1. Blinding of outcome assessment

7.3.1.1. Describe all measures used, if any, to blind outcome assessors from knowledge of which intervention a participant received. Provide any information relating to whether the intended blinding was effective

7.3.1.2. Please indicate your judgement

### 7.4. Attrition bias

#### 7.4.1. Incomplete outcome data

7.4.1.1. Describe the completeness of outcome data for each main outcome, including attrition and exclusions from the analysis. State whether attrition and exclusions were reported, the numbers in each intervention group (compared with total randomized participants), reasons for attrition/exclusions where reported, and any re-inclusions in analyses performed by the review authors

7.4.1.2. Please indicate your judgement

### 7.5. Reporting bias

#### 7.5.1. Selective reporting

7.5.1.1. State how the possibility of selective outcome reporting was examined by the review authors, and what was found.

7.5.1.2. Please indicate your judgement

### 7.6. Other bias

#### 7.6.1. Other source of bias

7.6.1.1. State any important concerns about bias not addressed in the other domains in the tool

7.6.1.2. Please indicate your judgement

### 8.1. Recruitment bias

8.1.1. Please describe any evidence of recruitment bias.

### 8.2. Baseline imbalances

8.2.1. Please describe any evidence of baseline imbalances.

### 8.3. Loss of clusters

8.3.1. Please indicate any evidence of risk of bias due to loss of clusters.

### 8.4. Incorrect analysis

8.4.1. Please indicate any evidence of incorrect analysis.

### 9.1. Control group

9.1.1. Outcome reported

9.1.2. Measure of effect size (as measured by the study authors)

9.1.3. Measure of dispersion (as measured by the study authors)

9.1.1. Outcome reported

9.1.2. Measure of effect size (as measured by the study authors)

9.1.3. Measure of dispersion (as measured by the study authors)

9.1.1. Outcome reported

9.1.2. Measure of effect size (as measured by the study authors)

9.1.3. Measure of dispersion (as measured by the study authors)

9.1.1. Outcome reported

9.1.2. Measure of effect size (as measured by the study authors)

9.1.3. Measure of dispersion (as measured by the study authors)

If more than one outcome was reported, please insert more cells here and copy and paste the relevant data entry boxes.

9.2. Intervention I group

9.2.1. Outcome reported

9.2.2. Measure of effect size (as measured by the study authors)

9.2.3. Measure of dispersion (as measured by the study authors)

9.2.1. Outcome reported

9.2.2. Measure of effect size (as measured by the study authors)

9.2.3. Measure of dispersion (as measured by the study authors)

9.2.1. Outcome reported

9.2.2. Measure of effect size (as measured by the study authors)

9.2.3. Measure of dispersion (as measured by the study authors)

9.2.1. Outcome reported

9.2.2. Measure of effect size (as measured by the study authors)

9.2.3. Measure of dispersion (as measured by the study authors)

If more than one outcome was reported, please insert more cells here and copy and paste the relevant data entry boxes.

9.3. Intervention II group

9.3.1. Outcome reported

9.3.2. Measure of effect size (as measured by the study authors)

9.3.3. Measure of dispersion (as measured by the study authors)

9.3.1. Outcome reported

9.3.2. Measure of effect size (as measured by the study authors)

9.3.3. Measure of dispersion (as measured by the study authors)

9.3.1. Outcome reported

9.3.2. Measure of effect size (as measured by the study authors)

9.3.3. Measure of dispersion (as measured by the study authors)

9.3.1. Outcome reported

9.3.2. Measure of effect size (as measured by the study authors)

9.3.3. Measure of dispersion (as measured by the study authors)

If more than one outcome was reported, please insert more cells here and copy and paste the relevant data entry boxes.

9.4. Intervention III group

9.4.1. Outcome reported

9.4.2. Measure of effect size (as measured by the study authors)

9.4.3. Measure of dispersion (as measured by the study authors)

9.4.1. Outcome reported

9.4.2. Measure of effect size (as measured by the study authors)

9.4.3. Measure of dispersion (as measured by the study authors)

9.4.1. Outcome reported

9.4.2. Measure of effect size (as measured by the study authors)

9.4.3. Measure of dispersion (as measured by the study authors)

If more than one outcome was reported, please insert more cells here and copy and paste the relevant data entry boxes.

9.5. Comparison I

9.5.1. Please indicate the intervention groups being compared

9.5.2. Please indicate the outcomes being compared

9.5.3. Statistical test used for the comparison

9.5.4. Result of the test

9.5.5. P value / Confidence intervals

9.6. Comparison II

9.6.1. Please indicate the intervention groups being compared

9.6.2. Please indicate the outcomes being compared

9.6.3. Statistical test used for the comparison

9.6.4. Result of the test

9.6.5. P value / Confidence intervals

9.7. Comparison III

9.7.1. Please indicate the intervention groups being compared

9.7.2. Please indicate the outcomes being compared

9.7.3. Statistical test used for the comparison

9.7.4. Result of the test

9.7.5. P value / Confidence intervals

9.8. Comparison IV

9.8.1. Please indicate the intervention groups being compared

9.8.2. Please indicate the outcomes being compared

9.8.3. Statistical test used for the comparison

9.8.4. Result of the test

9.8.5. P value / Confidence intervals

9.9. Comparison V

9.9.1. Please indicate the intervention groups being compared

9.9.2. Please indicate the outcomes being compared

9.9.3. Statistical test used for the comparison

9.9.4. Result of the test

9.9.5. P value / Confidence intervals

9.9. Comparison V

9.9.1. Please indicate the intervention groups being compared

9.9.2. Please indicate the outcomes being compared

9.9.3. Statistical test used for the comparison

9.9.4. Result of the test

9.9.5. P value / Confidence intervals

9.9. Comparison V

9.9.1. Please indicate the intervention groups being compared

9.9.2. Please indicate the outcomes being compared

9.9.3. Statistical test used for the comparison

9.9.4. Result of the test

#### 9.9.5. P value / Confidence intervals

For each comparison conducted in the study, please copy and paste the cells as appropriate

#### 10.1. Organisational setting

#### 10.2. Technological infrastructure

#### 10.3. Instructional Systems Design and Curriculum development

#### 10.4. Delivery

#### 10.5. Advantages of eLearning - as reported by the study authors

#### 10.6. Disadvantages of eLearning - as reported by the study authors

#### 11.1. Source of financing - as reported by the study authors

#### 11.2. Did the intervention undergo a formal accreditation process within the host institution?

#### 11.3. If yes, please describe

#### 11.4. Was the eLearning intervention developed for this study consequently adopted as a formal method for the delivery of education at the host institution?

#### 11.5. If yes, please specify

#### 12.1. Study conclusions - as stated by the study authors

#### 12.2. Limitations of the study - as reported by the study authors

#### 12.3. Was contact with the study authors sought? - If No, please go to section 12.5

#### 12.4. Please indicate the nature of the information requested from the study authors

#### 12.5. Please indicate the results of the request for information

#### 12.6. Additional notes

### 3: Results of electronic searches

Number of citations yielded by the electronic searches for each bibliographic database

| Database         | Results               |                      |
|------------------|-----------------------|----------------------|
|                  | Before de-duplication | After de-duplication |
| MEDLINE          | 941                   | 806                  |
| EMBASE           | 3206                  | 3123                 |
| PsycINFO         | 334                   | 334                  |
| Web of Knowledge | 6993                  | 4099                 |
| ERIC             | 146                   | 146                  |
| CENTRAL          | 588                   | 584                  |
| Total            | 12208                 | 9092                 |

## 4: Characteristics of included studies for online computer-based eLearning

4: Characteristics of included studies for online eLearning

| STUDY ID         | Methods      |          |                                   | Participants |                            |                       | Interventions                                                                                                                                                                                                                                                                                                                            |                                                                                                                          |                                                                                                                                                   |
|------------------|--------------|----------|-----------------------------------|--------------|----------------------------|-----------------------|------------------------------------------------------------------------------------------------------------------------------------------------------------------------------------------------------------------------------------------------------------------------------------------------------------------------------------------|--------------------------------------------------------------------------------------------------------------------------|---------------------------------------------------------------------------------------------------------------------------------------------------|
|                  | STUDY DESIGN | LOCATION | COMPARISON                        | TOTAL NUMBER | YEAR OF STUDY              | HEALTHCARE SPECIALITY | CHARACTERISTICS                                                                                                                                                                                                                                                                                                                          | TIME AND TECHNOLOGY                                                                                                      | TEST/OUTCOMES                                                                                                                                     |
| Al-Hazwani 2004a | RCT          | UK       | 4 computer-based medical patients | 38           | First year                 | Nursing               | CG: students in the control group did not have access to eLearning: World but received all the usual supervision and academic teaching as usual<br>IG: students had access to eLearning: World, computer software designed to improve medication dose calculation problem solving skills                                                 | 4 7 months<br>4 Computer, eLearning: World software                                                                      | Knowledge: overall numerical grade                                                                                                                |
| Al-Hazwani 2004b | RCT          | UK       | 4 computer-based medical patients | 38           | First year                 | Nursing               | CG: students in the control group did not have access to eLearning: World but received all usual supervision and academic teaching as usual<br>IG: Students had access to eLearning: World, computer software designed to improve medication dose calculation problem solving skills                                                     | 4 6 months<br>4 Computer, eLearning: World software                                                                      | Knowledge: overall numerical grade                                                                                                                |
| Amey 2004        | RCT          | Scoti    | 4 computer-based medical patients | 68           | Second year                | Physiotherapy         | CG: books and notes<br>IG: students had access to a website with detailed information, including clinical data, images and self-assessment features                                                                                                                                                                                      | 4 3 weeks<br>4 computer, website                                                                                         | Knowledge: NSQ<br>Skills: OSCE<br>Satisfaction: positive<br>Likert scale: overall course                                                          |
| Bauman 2000      | RCT          | USA      | 4 computer-based medical patients | 8            | Fourth year                | Medicine              | CG: students received no CG<br>IG: students used the eLearning: World                                                                                                                                                                                                                                                                    | 4 6 weeks<br>4 computer, website                                                                                         | Knowledge: standardized written examination<br>Satisfaction: survey                                                                               |
| Beebe 2004       | RCT          | Canada   | 4 computer-based medical patients | 214          | Final year                 | Nursing               | CG: students received a lecture<br>IG: an e-learning session on pressure ulcers                                                                                                                                                                                                                                                          | 4 1 hour<br>4 computer, website                                                                                          | Knowledge: 3 or more independent assessments<br>Satisfaction: equal value<br>Duration: observed on or reassessment                                |
| Bowles 2003      | RCT          | UK       | 4 computer-based medical patients | 70           | First year                 | Nursing               | CG: students received a face-to-face session which reinforced the content and structure of the tutorial<br>IG: students in the intervention group worked through the online tutorial which they passed into a dedicated area on the university's virtual learning environment                                                            | 4 1 hour<br>4 computer, online access                                                                                    | Skills: all research skills were involved a search of the cumulative index to nursing and allied health literature (CINAHL) on a given topic area |
| Burwell 2002     | RCT          | USA      | 4 computer-based medical patients | 51           | Second year to fourth year | Medicine              | CG: students received lectures with no access to the web tutorial<br>IG1: students in the computer group had access to the computer tutorial on the web<br>IG2: students in this group had access both the lecture and web tutorial                                                                                                      | 4 4 hrs + 1 hr<br>4 computer with Macromedia Flash, Cold Fusion Studio (Macromedia), RealVideo (realized), online access | Knowledge: cognitive assessment and literature<br>Skills: literature, literature assessment                                                       |
| Cannone 2001     | RCT          | Scoti    | 4 computer-based medical patients | 6            | N/A                        | Physiotherapy         | CG: students received study sessions and were all used to all (study) all medical students and books<br>IG: students had access to the web-based intervention and had a learning, learning, and learning session<br>CG: Students: Health, Books, Case Studies on Oral Health<br>IG: Students: Health, Books, Case Studies on Oral Health | 4 6 weeks<br>4 computer, website                                                                                         | Skills: OSCE<br>Satisfaction: positive<br>Likert scale: (1-5 overall grade)<br>Satisfaction: positive<br>Likert scale: (1-5 overall grade)        |

| STUDY ID      | Methods      |             |                                            | Participants |               |                                            | Interventions                                                                                                                                                                                                                                                                                                                                                        |                                                                                                                |                                                                                                                                                                                     |
|---------------|--------------|-------------|--------------------------------------------|--------------|---------------|--------------------------------------------|----------------------------------------------------------------------------------------------------------------------------------------------------------------------------------------------------------------------------------------------------------------------------------------------------------------------------------------------------------------------|----------------------------------------------------------------------------------------------------------------|-------------------------------------------------------------------------------------------------------------------------------------------------------------------------------------|
|               | STUDY DESIGN | LOCATION    | COMPARISON                                 | TOTAL NUMBER | YEAR OF STUDY | HEALTHCARE SPECIALITY                      | CHARACTERISTICS                                                                                                                                                                                                                                                                                                                                                      | TIME AND TECHNOLOGY                                                                                            | TEST/OUTCOMES                                                                                                                                                                       |
|               |              |             |                                            |              |               |                                            |                                                                                                                                                                                                                                                                                                                                                                      |                                                                                                                |                                                                                                                                                                                     |
| Chen1993      | RCT          | Israel      | 4 semesters traditional learning & seminar | 94           | First year    | Medicine                                   | CG: students had access to all lecture notes on the Internet that were based on the study protocol<br>IG: students had access to an interactive website                                                                                                                                                                                                              | 4 to 6 weeks<br>+ computer, website, HTML, active server page (ASP), database (SQL), Java, Microsoft           | Knowledge: interactive evaluation about medications                                                                                                                                 |
| Chen1997      | RCT          | USA         | 4 semesters traditional learning           | 127          | 1st year      | Health education or undergraduate students | CG: students received no training and proceeded directly into textbook reading and lecture notes<br>IG: students received a virtual advance organizer<br>IG II: students used the advance organizer and were asked to discuss concepts and add information to the organizer note in a web format                                                                     | 4 to 6 weeks<br>+ computer, a virtual concept map software, concept advance organizer                          | Knowledge: concept map<br>The effect size included multiple choice and essay questions, post test II only and a complex scenario question was administered one week after post test |
| Chen1998      | RCT          | Taiwan      | 4 semesters traditional learning           | 120          | Fourth year   | Pharmacy                                   | CG: students received only lecture notes and no additional material<br>IG: students received on the web format used two computer based learning tool with which students could drill and practice to ease to test their learning through automatic self-evaluation                                                                                                   | 4 to 6 weeks<br>+ computer, online access to the e-learning system                                             | Knowledge: midterm and final test                                                                                                                                                   |
| Corcoran      | RCT          | USA         | 4 semesters traditional learning           | 121          | Third year    | Medicine                                   | CG: students received identical package of textbook & did not receive any additional instruction<br>IG: students received a computer network—CNS—database taught as a method for identifying underlying disorders of health issues<br>IG II: students had access to web material including slides and received that CNS as personalized instruction via the Internet | 4 to 6 weeks<br>+ computer, website, videos                                                                    | Skill: performance simulation<br>All but 1 used a computer. Universal (1 incorrectly diagnosed a coronary artery)                                                                   |
| D'Amico1993   | RCT          | USA         | 4 semesters traditional learning           | 81           | 1st year      | Dentistry                                  | CG: students received no additional material beyond what was delivered in their curriculum<br>IG: students received a web-based training program comprised of three interactive intervention components: all three on overheads and learning objectives. The content material was presented in oral case interactive format                                          | 4 to 6 weeks<br>+ computer, website                                                                            | Knowledge, skill and attitudes were all measured using a 10-item. When type of oral exam is based on the conceptual framework, results                                              |
| Enderson1993  | RCT          | USA         | 4 semesters traditional learning           | 18           | Third year    | Pharmacy                                   | CG: students received no intervention<br>IG: students received a web-based tutorial                                                                                                                                                                                                                                                                                  | 4 to 6 hours<br>+ computer, website, video                                                                     | Knowledge: content ended based on describing available process of oral medication<br>Skill: a new standardized oral exam was                                                        |
| Farahmand1998 | RCT          | Switzerland | 4 semesters traditional learning           | 121          | Second year   | Medicine                                   | CG: students were taught in an overhead of clinical skills in room and all were aware of all the discussion & additional resources<br>IG: students had access to Moodle – for searching slides, learning resources, reading notes, looking up a concept and linking to relevant website and questions                                                                | 4 to 6 weeks<br>+ computer, online access                                                                      | Knowledge: concept simulation<br>Skill: questions involving Universal and open questions                                                                                            |
| Flannery1993  | RCT          | USA         | 4 semesters traditional learning           | 121          | First year    | Dentistry                                  | CG: web-based self-instruction and all key audio case self-instruction<br>IG: while some studied the nondigital arch using the all key audio case and the nondigital arch using the web-based self-instruction                                                                                                                                                       | 4 to 6 weeks<br>+ all desired audio case access, computer and online access for the web-based self-instruction | Knowledge: concept fill in the blank, oral case<br>Skill: questions, confidence survey consisted of a closed one with 1 item and a multiple                                         |

| STUDY ID       | Methods      |          |                                               | Participants |                                          |                       | Interventions                                                                                                                                                                                                                                                                                                                                                                                                                                                                                                                                                                 |                                                                                                                                                     |                                                                                                                                                                                                                                                                                                                                                                     |
|----------------|--------------|----------|-----------------------------------------------|--------------|------------------------------------------|-----------------------|-------------------------------------------------------------------------------------------------------------------------------------------------------------------------------------------------------------------------------------------------------------------------------------------------------------------------------------------------------------------------------------------------------------------------------------------------------------------------------------------------------------------------------------------------------------------------------|-----------------------------------------------------------------------------------------------------------------------------------------------------|---------------------------------------------------------------------------------------------------------------------------------------------------------------------------------------------------------------------------------------------------------------------------------------------------------------------------------------------------------------------|
|                | STUDY DESIGN | LOCATION | COMPARISON                                    | TOTAL NUMBER | YEAR OF STUDY                            | HEALTHCARE SPECIALITY | CHARACTERISTICS                                                                                                                                                                                                                                                                                                                                                                                                                                                                                                                                                               | TIME AND TECHNOLOGY                                                                                                                                 | TEST/OUTCOMES                                                                                                                                                                                                                                                                                                                                                       |
| Fluorimetry    | RCT          | USA      | standard care<br>multidisciplinary learning   | 26           | Fourth year                              | Pharmacy              | CG students received no intervention on their online drug education.<br>KI students in this group were given a website address to access real time data on cases which they were required to search to learn on their training and standardize their counselling tool before in the use of Inhalers and ear and eye drops.                                                                                                                                                                                                                                                    | 4 hrs only<br>+ computer with<br>PowerPoint and<br>Internet capabilities<br>for digital video and<br>audio, email facilities,<br>web browsing, etc. | Knowledge to know how to use                                                                                                                                                                                                                                                                                                                                        |
| Full body      | RCT          | Germany  | standard care<br>multidisciplinary learning   | 14           | Fourth year + 1 year of medical training | Medicine              | CG students received a paper booklet and did identical content to the intervention, but without needs with multiple assessment and web-based decision tool.<br>KI students received an online module with course about patient evaluation and assessment.                                                                                                                                                                                                                                                                                                                     | 4 days H/R<br>+ computer website                                                                                                                    | Knowledge to know NCC<br>Skill to do standardized<br>tasks and open questions<br>assessed toward a procedural<br>understanding of the content on<br>MILKUS, assessment on<br>Current Medication<br>Satisfaction, confidence in the<br>Use of Computer-based analysis                                                                                                |
| Fitbits        | RCT          | USA      | standard care<br>learning                     | 74           | N/A                                      | Nurse                 | CG students received a web-based course on cardiovascular intervention.<br>KI: this group worked together on case studies, peer review, and all patients independently. Students in this online group also used online choice to enhance their understanding of course content.                                                                                                                                                                                                                                                                                               | 4 weeks<br>+ computer website                                                                                                                       | Knowledge to know constraints<br>to form multiple choice<br>questions<br>Satisfaction, attitude toward<br>computer-assisted instruction<br>(a) 10-item scale, each<br>measured on a 5-point scale,<br>and three factors (i.e., content,<br>usability, function).                                                                                                    |
| Cardiovascular | RCT          | Thailand | standard care<br>multidisciplinary learning   | 26           | Fourth year                              | Nurse                 | CG students received lecture and case file on individual.<br>KI students had access to a web-based learning unit around the lecture content or individual.                                                                                                                                                                                                                                                                                                                                                                                                                    | 4 weeks<br>+ computer capable of<br>accessing interactive<br>materials, animation,<br>and online access                                             | Knowledge to know<br>cardiovascular<br>Skill to perform a checklist<br>MILKUS, performance analysis,<br>analysis, and evaluation of<br>performance (personality<br>diagnosis) to a (person) patient<br>Satisfaction, clinical assessment<br>of clinical performance<br>Use of online tool for<br>each item analysis from 1 (not<br>answered) to 4 (highly answered) |
| Heart rate     | RCT          | USA      | 4 samples to<br>multidisciplinary<br>learning | 26           | Third year                               | Medicine              | CG students from the previous year served as historical control and address the second research question that compared students not using the intervention to those who did not.<br>KI students had access to a web-based standardized case file course.<br>KI students worked in groups of three and conducted a total of three CPR courses. Students received one of three cases in each encounter (link to conductive encounter, observe, conduct the checklist on history taking and physical examination on history, or observe conduct the checklist on communication). | 4 hours<br>+ computer website                                                                                                                       | Skill a checklist<br>Satisfaction, observation<br>analysis, and assessment on a<br>Ultrasonography manual motion<br>(1-5) (1-5), (2-5), (3-5), (4-5), and (5-5)                                                                                                                                                                                                     |
| Healthcare     | RCT          | USA      | 4 samples to<br>multidisciplinary<br>learning | 26           | Second year                              | Medicine              | CG students received a traditional lecture and case work.<br>KI students received a computer-assisted instruction manual was developed that covers the essential role of all in examination and the terminal role used to develop and checklist on health on medical case and distribution.                                                                                                                                                                                                                                                                                   | 4 days<br>+ computer website                                                                                                                        | Knowledge to know on case<br>analysis and distribution                                                                                                                                                                                                                                                                                                              |

| STUDY ID        | Methods      |          |                                   | Participants |               |                       | Interventions                                                                                                                                                                                                                         |                                                                                                                                                         |                                                                                                                                                                                                                                                                                                                                                     |
|-----------------|--------------|----------|-----------------------------------|--------------|---------------|-----------------------|---------------------------------------------------------------------------------------------------------------------------------------------------------------------------------------------------------------------------------------|---------------------------------------------------------------------------------------------------------------------------------------------------------|-----------------------------------------------------------------------------------------------------------------------------------------------------------------------------------------------------------------------------------------------------------------------------------------------------------------------------------------------------|
|                 | STUDY DESIGN | LOCATION | COMPARISON                        | TOTAL NUMBER | YEAR OF STUDY | HEALTHCARE SPECIALITY | CHARACTERISTICS                                                                                                                                                                                                                       | TIME AND TECHNOLOGY                                                                                                                                     | TEST/OUTCOMES                                                                                                                                                                                                                                                                                                                                       |
|                 |              |          |                                   |              |               |                       |                                                                                                                                                                                                                                       |                                                                                                                                                         |                                                                                                                                                                                                                                                                                                                                                     |
| Johnson         | RCT          | Israel   | classroom vs. traditional lecture | 88           | Fourth year   | Medicine              | CG: students had to deal in a normal without the use of the Internet. IG: these students had to design a number scheduled into the website.                                                                                           | <ul style="list-style-type: none"> <li>4 free NUS</li> <li>computer, website</li> </ul>                                                                 | Knowledge: MCQ<br>Satisfied on research form (increased in the work)                                                                                                                                                                                                                                                                                |
| Barbany et al.  | RCT          | Canada   | classroom vs. traditional lecture | 77           | Second year   | Medicine              | CG: students were presented with the real-world case on printed card. IG: this group received an online computer-aided module that covered real-life case.                                                                            | <ul style="list-style-type: none"> <li>4 minutes on average</li> <li>computer with online access with MedCAT Vets</li> </ul>                            | Knowledge: MCQ and direct case used the on-line material<br>Satisfied on questionnaire                                                                                                                                                                                                                                                              |
| Markovitch      | RCT          | USA      | classroom vs. classroom           | 111          | Third year    | Medicine              | CG: students received web-based training covering basic oncologic history and an online algorithm task. IG: students received interactive case education covering real-world oncologic history and an online algorithm task.          | <ul style="list-style-type: none"> <li>CG: 10 to 15 weeks<br/>IG: 6 weeks</li> <li>computer with email, internet and online access</li> </ul>           | Knowledge: a self-assessment questionnaire and MCQ                                                                                                                                                                                                                                                                                                  |
| Markovitch      | RCT          | USA      | classroom vs. classroom           | 73           | Third year    | Medicine              | CG: students received a home daily IG: students received daily email including an evaluation and educational components where responses to cases were submitted online.                                                               | <ul style="list-style-type: none"> <li>6 weeks</li> <li>computer with email, internet, online access for "MyCourse" course management system</li> </ul> | Knowledge: orthopedic assessment on form for each patient                                                                                                                                                                                                                                                                                           |
| Konradi et al.  | RCT          | USA      | classroom vs. traditional lecture | 68           | Second year   | Dentistry             | CG: students received only hard copy of dental records. IG: this group used digital records on computers.                                                                                                                             | <ul style="list-style-type: none"> <li>4 free NUS</li> <li>computer, online access</li> </ul>                                                           | Knowledge: orthopedic assessment on form for each patient<br>Satisfied on survey done at the end of the course for acceptance of the web-based education                                                                                                                                                                                            |
| Leung et al.    | RCT          | China    | classroom vs. traditional lecture | 73           | Fourth year   | Medicine              | CG: students did not receive the worksheet, no ill cases or related material during their own history lesson. IG: students received case in a worksheet on clinical reason rather than web-based.                                     | <ul style="list-style-type: none"> <li>40 minutes lecture classes, final exam worksheet</li> <li>computer, online access</li> </ul>                     | Knowledge: clinical reasoning problems (CRP) score and clinical thinking inventory (CTI) score<br>Satisfied on form within questionnaire, each item, students rated the cases as useful, 4 items scale (never useful at all, 4 items only agree)                                                                                                    |
| Leung et al.    | RCT          | USA      | classroom vs. traditional lecture | 73           | N/A           | Medicine              | CG: students had to prepare a written answer on unrelated case. IG: students could read case on the computer. IG: two computer cases on feedback, only 10 days previous and on weekends.                                              | <ul style="list-style-type: none"> <li>4 free NUS</li> <li>computer, online access</li> </ul>                                                           | Knowledge: a case based on dermatitis final exam that was given throughout the three previously cited. 25 open questions on previously, feedback, exam, and 10 days access (CG: computer case-related) were included in the exam. 20 students < 30 completed the cases. Satisfied on anonymous student online questionnaire on a seven-point scale. |
| Leung et al.    | RCT          | Canada   | classroom vs. traditional lecture | 116          | Second year   | Medicine              | CG: students received a PowerPoint presentation and were allowed to use two non-programming textbooks. IG: students used an online real-time action tool in electronic medical case tool.                                             | <ul style="list-style-type: none"> <li>4 final exam</li> <li>computer, online access</li> </ul>                                                         | Knowledge: a case based on dermatitis final exam<br>Satisfied on questionnaire and assessment on a seven-point scale                                                                                                                                                                                                                                |
| Liberman et al. | RCT          | USA      | classroom vs. traditional lecture | 100          | Second year   | Medicine              | CG: students were not assigned a password and could not participate in the web discussion. IG: students had an internet connection and used the application to discuss a series of four cases involving substantial ethical problems. | <ul style="list-style-type: none"> <li>4 free NUS</li> <li>computer, online access</li> </ul>                                                           | Knowledge: final written case analysis<br>Satisfied on subjective evaluation of the course by both students (using a course evaluation instrument) and faculty (all cases evaluation instrument developed for this study)                                                                                                                           |

| STUDY ID        | Methods      |          |                                  | Participants |               |                       | Interventions                                                                                                                                                                                                                                                                                     |                                                                              |                                                                                                                                                                                                                                                                                                                                                                                                                 |
|-----------------|--------------|----------|----------------------------------|--------------|---------------|-----------------------|---------------------------------------------------------------------------------------------------------------------------------------------------------------------------------------------------------------------------------------------------------------------------------------------------|------------------------------------------------------------------------------|-----------------------------------------------------------------------------------------------------------------------------------------------------------------------------------------------------------------------------------------------------------------------------------------------------------------------------------------------------------------------------------------------------------------|
|                 | STUDY DESIGN | LOCATION | COMPARISON                       | TOTAL NUMBER | YEAR OF STUDY | HEALTHCARE SPECIALITY | CHARACTERISTICS                                                                                                                                                                                                                                                                                   | TIME AND TECHNOLOGY                                                          | TEST/OUTCOMES                                                                                                                                                                                                                                                                                                                                                                                                   |
|                 |              |          |                                  |              |               |                       |                                                                                                                                                                                                                                                                                                   |                                                                              |                                                                                                                                                                                                                                                                                                                                                                                                                 |
| Luttrell        | RCT          | Taiwan   | 4-arm (vs. traditional learning) | 14           | Second year   | Nurse                 | CG: evidence on pre- and post-classroom lecture and skill demonstration. IG: students were able to use a web-based course and were able to review the content on demand with access to a classroom, bulletin board, and email.                                                                    | 4 days + 10%<br>+ computer, online access and Intervention software          | Knowledge: Increase of an infection knowledge assessment at day 0 and a questionnaire<br>Skill: a 1-minute star infection skill performance + email with possible e-course material from a website                                                                                                                                                                                                              |
| Abbaszadeh      | RCT          | USA      | 4-arm (vs. traditional learning) | 67           | N/A           | Nurse                 | CG: evidence independently read and learned from a pre-based traditional module.<br>IG 1: evidence independently read and learned from a pre-based traditional module with income included.<br>IG 2: evidence viewed the pre-module in a multimedia format on a screen in the form of a web page. | 4 x 1 hour<br>+ computer, online access                                      | Knowledge: pre-MCOQ<br>Skill: before, go home, awareness during the respondents to identify the level of confidence on a 10-point scale + ranking from no confidence at all to complete confidence<br>Satisfaction: evidence of a reaction survey the participants were asked to rate satisfaction of the learning module on a scale of 1 to 5 (1 indicating strongly disagree and 5 indicating strongly agree) |
| Alfakhri et al. | RCT          | Germany  | 4-arm (vs. traditional learning) | 88           | Fourth year   | Medicine              | CG: evidence looked at lecture procedures and recorded in radiology and radiological four sessions the + learned on-line.<br>IG: evidence viewed and read the procedure and recorded in radiology and radiological four sessions the + learned on-line.                                           | 4 days + 10%<br>+ computer, online access                                    | Knowledge: cases consisted of 20 cases, which were randomly chosen from a pool of 107 read cases                                                                                                                                                                                                                                                                                                                |
| Harbani et al.  | RCT          | UK       | 4-arm (vs. traditional learning) | 150          | N/A           | Medicine              | CG: evidence were all with access to a learning management system incorporating the course materials with no formal learning system.<br>IG: evidence used an online course learning difficulty learning outcome.                                                                                  | 4 weeks<br>+ computer, online access                                         | Knowledge: post intervention MCOQ questionnaire<br>Skill: before and online                                                                                                                                                                                                                                                                                                                                     |
| Mathew et al.   | RCT          | Sweden   | 4-arm (vs. traditional learning) | 18           | Second year   | Dentistry             | CG: evidence on pre- and post-classroom lecture and evidence on pre- and post-classroom lecture and evidence on pre- and post-classroom lecture.<br>IG: evidence had access to a web-based and evidence on pre- and post-classroom lecture and evidence on pre- and post-classroom lecture.       | 4 weeks<br>+ computer containing the intervention software and online access | Knowledge: before using system comparison between their answer and that of the expert and oral performance<br>Satisfaction: questionnaire                                                                                                                                                                                                                                                                       |
| Hunka et al.    | RCT          | Germany  | 4-arm (vs. traditional learning) | 85           | Third year    | Dentistry             | CG: evidence received didactic lecture and self-paced learning on-line.<br>IG: evidence had access to a web-based and evidence on pre- and post-classroom lecture and evidence on pre- and post-classroom lecture.                                                                                | 6 weeks<br>+ computer with online platform and email client                  | Knowledge: MCOQ<br>Skill: before, after email with answers chosen between 1 and 5 (1 = totally disagree, 5 = I totally agree +), awareness of course<br>Satisfaction: questionnaire                                                                                                                                                                                                                             |
| Hunka et al.    | RCT          | Germany  | 4-arm (vs. traditional learning) | 85           | Third year    | Dentistry             | CG: evidence received a traditional lecture.<br>IG: evidence had access to a traditional lecture and self-paced learning on-line and evidence on pre- and post-classroom lecture and evidence on pre- and post-classroom lecture.                                                                 | 6 x 15 minute sessions<br>+ computer with online platform and email client   | Satisfaction: questionnaire                                                                                                                                                                                                                                                                                                                                                                                     |

| STUDY ID     | Methods      |               |                                        | Participants |                                   |                                   | Interventions                                                                                                                                                                                                                                                                                                                                                                                                                                                        |                                                                                                                                                                                                                                               |                                                                                                                                                                                                                                                                                                    |
|--------------|--------------|---------------|----------------------------------------|--------------|-----------------------------------|-----------------------------------|----------------------------------------------------------------------------------------------------------------------------------------------------------------------------------------------------------------------------------------------------------------------------------------------------------------------------------------------------------------------------------------------------------------------------------------------------------------------|-----------------------------------------------------------------------------------------------------------------------------------------------------------------------------------------------------------------------------------------------|----------------------------------------------------------------------------------------------------------------------------------------------------------------------------------------------------------------------------------------------------------------------------------------------------|
|              | STUDY DESIGN | LOCATION      | COMPARISON                             | TOTAL NUMBER | YEAR OF STUDY                     | HEALTHCARE SPECIFICITY            | CHARACTERISTICS                                                                                                                                                                                                                                                                                                                                                                                                                                                      | TIME AND TECHNOLOGY                                                                                                                                                                                                                           | TEST/OUTCOMES                                                                                                                                                                                                                                                                                      |
|              |              |               |                                        |              |                                   |                                   |                                                                                                                                                                                                                                                                                                                                                                                                                                                                      |                                                                                                                                                                                                                                               |                                                                                                                                                                                                                                                                                                    |
| Odessa 2006  | RCT          | USA           | 4. simulation vs. traditional learning | 98           | Third year                        | Medical                           | CG: students received traditional lecture-based<br>IG: students received a web-based<br>Interactive program created to teach<br>web-based learning including the basic<br>mechanisms of renal and endocrine<br>function                                                                                                                                                                                                                                              | 4 weeks<br>computer with internet access<br>audio and video support                                                                                                                                                                           | Knowledge of NCCQ<br>Attitudes, surveying the UHerscale<br>to assess the students attitude<br>toward learning, networking, and<br>feedback presentation                                                                                                                                            |
| Palmer 2006  | RCT          | Canada        | 4. simulation vs. traditional learning | 101          | Fourth year                       | Medical                           | CG: students received standard lecture-based<br>traditional with varying additional handout<br>material other than those recommended<br>to all students<br>IG: students received same case studies<br>as control, but in an interactive computer<br>based format and used internet with<br>detailed feedback<br>IG: students received both the<br>standard clinical material and interactive<br>computer-based case studies                                          | 4 weeks<br>computer with Internet<br>software installed, online<br>access and CD drive                                                                                                                                                        | Knowledge of NCCQ and<br>planning modified question case<br>Satisfaction as a questionnaire of<br>their perceptions of the value of<br>their resources                                                                                                                                             |
| Park 2006    | RCT          | Germany       | 4. simulation vs. traditional learning | 94           | Second and third initial semester | Dentary                           | CG: students received all lecture presented<br>the same content. Included note-taking<br>photos, with the use of PowerPoint. It<br>was evaluated for the students to question<br>or discuss during and after the lecture<br>IG: students received a modular and online<br>of course of clinical education, NRE and<br>anatomical. It was linked with a search in the<br>virtual means of a for and business<br>with case presentation only, and further<br>resources | 4 sessions they learned<br>(average 60 minutes)<br>computer with internet<br>access                                                                                                                                                           | Knowledge of NCCQ and three case<br>presentations<br>Satisfaction of awareness about<br>educational and alignment value<br>of the teaching methods were given<br>and the students were asked to<br>express their assessment on a com-<br>puter UHerscale (4 = no awareness,<br>5 = full awareness) |
| Phadnis 2006 | RCT          | USA and India | 4. simulation vs. traditional learning | 85           | Second and third year             | All drive, nursing,<br>physiology | CG: students received a written syllabus<br>for biomedical sciences module offered<br>with face-to-face instruction<br>IG: students used a written syllabus<br>conducted in a virtual environment using<br>virtual tools (PPT, email) and resources<br>provided as tools                                                                                                                                                                                             | 4 days 1/2<br>computer with Web + over<br>the PowerPoint, Internet<br>Access (AOL, Skype)<br>Internet, 4, 1/2 day (over<br>social media) access and<br>email support                                                                          | Knowledge gained without<br>face-to-face meeting<br>Satisfaction UHerscale with<br>face-to-face interaction and a<br>distant learning                                                                                                                                                              |
| Rausch 2006  | RCT          | Germany       | 4. simulation vs. traditional learning | 108          | Fourth year                       | Medical                           | CG: students received traditional<br>classroom teaching and various study on<br>case histories<br>IG: students accessed web-based<br>collaborative webinars and on the<br>differential diagnosis of diseases                                                                                                                                                                                                                                                         | 4 weeks<br>web-based collaborative<br>teaching module, 2<br>learning resources were<br>agreed (CD) the Internet<br>live chat, asynchronous<br>group of all cases and the<br>exchange of documents was<br>used to create the on-line<br>module | Knowledge of NCCQ (post-test)<br>problem solving module (final<br>test)<br>Satisfaction questionnaire                                                                                                                                                                                              |
| Rausch 2006  | RCT          | Germany       | 4. simulation vs. traditional learning | 70           | Fourth year                       | Medical                           | CG: no description given<br>IG: students received case study on online<br>module consisting in addition to the<br>traditional teaching module                                                                                                                                                                                                                                                                                                                        | 4 hours case-based over week<br>over 6 weeks<br>computer with online access<br>for the web-based learning<br>resources agreed (CD)                                                                                                            | Knowledge of NCCQ<br>Satisfaction survey conducted at<br>diverse and at the end of the 6<br>week course                                                                                                                                                                                            |

| STUDY ID     | Methods      |                 |                                  | Participants |                                             |                       | Interventions                                                                                                                                                                                                                                                                                   |                                                                                                                                                                                                  |                                                                                                                                                                                                                                                                                                                                                                                                                                                                                                       |
|--------------|--------------|-----------------|----------------------------------|--------------|---------------------------------------------|-----------------------|-------------------------------------------------------------------------------------------------------------------------------------------------------------------------------------------------------------------------------------------------------------------------------------------------|--------------------------------------------------------------------------------------------------------------------------------------------------------------------------------------------------|-------------------------------------------------------------------------------------------------------------------------------------------------------------------------------------------------------------------------------------------------------------------------------------------------------------------------------------------------------------------------------------------------------------------------------------------------------------------------------------------------------|
|              | STUDY DESIGN | LOCATION        | COMPARISON                       | TOTAL NUMBER | YEAR OF STUDY                               | HEALTHCARE SPECIALITY | CHARACTERISTICS                                                                                                                                                                                                                                                                                 | TIME AND TECHNOLOGY                                                                                                                                                                              | TEST/OUTCOMES                                                                                                                                                                                                                                                                                                                                                                                                                                                                                         |
|              |              |                 |                                  |              |                                             |                       |                                                                                                                                                                                                                                                                                                 |                                                                                                                                                                                                  |                                                                                                                                                                                                                                                                                                                                                                                                                                                                                                       |
| BK140004     | RCT          | Canada          | classroom vs individual learning | 28           | Third and fourth year                       | Medicine              | CG: students received no intervention and were assessed only<br>KI: students completed multimedia-based conceptual and procedure modules                                                                                                                                                        | <ul style="list-style-type: none"> <li>4 minutes</li> <li>consumed online access with support for digital images, short video clips, and instructional text, images, hospital website</li> </ul> | Knowledge post-test multiple-choice + explanation                                                                                                                                                                                                                                                                                                                                                                                                                                                     |
| PR040004     | RCT          | Ireland         | traditional classroom            | 28           | Third year                                  | All others            | CG: students received course material offered through conventional method (e.g. and were able to engage in an email discussion with an instructor for a novel interactive web-based learning<br>KI: students used MIBCT access access to the study materials, discussion forum, resource system | <ul style="list-style-type: none"> <li>3 weeks</li> <li>consumed online access for MIBCT</li> </ul>                                                                                              | Knowledge post-test multiple-choice, narrative and short answer questions<br>Self-reflection, impact of CT, confidence of training and the Learning Experience/ confidence of learning a novel format scale                                                                                                                                                                                                                                                                                           |
| SD140003     | RCT          | USA             | traditional classroom            | 28           | Second to fourth year (third year and year) | Medicine              | CG: students received a PowerPoint presentation<br>KI: students received an online self-paced, self-directed learning module provided self-education                                                                                                                                            | <ul style="list-style-type: none"> <li>1 month</li> <li>consumed PowerPoint presentation and online access</li> </ul>                                                                            | Knowledge measured with a modified version of the Dermatology Knowledge and Attitude survey                                                                                                                                                                                                                                                                                                                                                                                                           |
| SD1400040001 | RCT          | Sweden          | classroom vs classroom           | 28           | First year                                  | Dentistry             | CG: students were able to watch a conventional web-based video<br>KI: students had access to the same web-based video but also to two different cases                                                                                                                                           | <ul style="list-style-type: none"> <li>1 week</li> <li>consumed online access</li> </ul>                                                                                                         | Knowledge self-assessment with 6 questions<br>Skill performance was based on a self-reported (post-test self) for each of 6 different areas of hand washing<br>All tasks a conventional method with 6 questions<br>Overall knowledge and attitude toward video-based instruction and learning was filled in after completion of all the phases. 7 of three question were answered on a Visual Analogue Scale (VAS) 0-100 mm and the remaining 3 were open text questions                              |
| SD1400012    | RCT          | The Netherlands | classroom vs individual learning | 128          | Second year                                 | Medicine              | CG: students received photographs of cases of an occupational medicine workbook, practice guidelines, material and advertisement<br>KI: students had access to an occupational medicine classroom case on individual computers                                                                  | <ul style="list-style-type: none"> <li>half a day</li> <li>consumed online access</li> </ul>                                                                                                     | Knowledge: 20 questions divided in multiple-choice, open-ended and multiple-choice<br>All tasks 10 questions on a 5-point Likert scale + was used with an hour-minute time difference to score<br>Self-reflection: 6 questions + was a self-reflection for satisfaction (range 1-10), 6 questions about satisfaction with the course content (1-point Likert scale), minimum score 6 maximum 18<br>and 3 question about satisfaction with learning (1-point Likert scale, minimum score 3 maximum 18) |
| SD14000001   | RCT          | USA             | classroom vs individual learning | 28           | Fourth year                                 | Medicine              | CG: students received a live lecture and then group discussion work<br>KI: students received an Internet-based PowerPoint® slide presentation from the same lecture with the option of audio                                                                                                    | <ul style="list-style-type: none"> <li>three 15/30</li> <li>consumed PowerPoint® presentation and online access and audio</li> </ul>                                                             | Knowledge: an open book exam that has been used on the course for 1 year<br>Self-reflection: students used the self-reflection with their course on a 5-point Likert scale + and they provided narrative about their satisfaction with the live lecture and the online lecture                                                                                                                                                                                                                        |

| STUDY ID      | Methods      |               |                                            | Participants |                       |                       | Interventions                                                                                                                                                                                                                                                                                                                                                                                                                                                                                                                                                                       |                                                                                                                |                                                                                                                                                                                                                                                                   |
|---------------|--------------|---------------|--------------------------------------------|--------------|-----------------------|-----------------------|-------------------------------------------------------------------------------------------------------------------------------------------------------------------------------------------------------------------------------------------------------------------------------------------------------------------------------------------------------------------------------------------------------------------------------------------------------------------------------------------------------------------------------------------------------------------------------------|----------------------------------------------------------------------------------------------------------------|-------------------------------------------------------------------------------------------------------------------------------------------------------------------------------------------------------------------------------------------------------------------|
|               | STUDY DESIGN | LOCATION      | COMPARISON                                 | TOTAL NUMBER | YEAR OF STUDY         | HEALTHCARE SPECIALITY | CHARACTERISTICS                                                                                                                                                                                                                                                                                                                                                                                                                                                                                                                                                                     | TIME AND TECHNOLOGY                                                                                            | TEST/OUTCOMES                                                                                                                                                                                                                                                     |
|               |              |               |                                            |              |                       |                       |                                                                                                                                                                                                                                                                                                                                                                                                                                                                                                                                                                                     |                                                                                                                |                                                                                                                                                                                                                                                                   |
|               |              |               |                                            |              |                       |                       |                                                                                                                                                                                                                                                                                                                                                                                                                                                                                                                                                                                     |                                                                                                                |                                                                                                                                                                                                                                                                   |
| Self-directed | RCT          | USA           | 4 arm (two traditional learning, 4 online) | 2            | Third and fourth year | Medicine              | G1: audience received an online lecture consisted of an Intranet-based PowerPoint™ slide presentation with no audio narration.<br>K1: audience received an online lecture consisted of an Intranet-based PowerPoint™ slide presentation with audio narration.                                                                                                                                                                                                                                                                                                                       | • three H/Js<br>• web-based (any H/Js)                                                                         | Knowledge assessment:<br>Included a discussion questions that solicited approaches to a hypothetical patient.<br>Satisfaction: students rated their satisfaction with their lecture on a 5-point Likert scale and they provided narrative about their experience. |
| Self-directed | RCT          | USA           | 4 arm (two traditional learning, 4 online) | 10           | Third year            | Health care           | G1: audience received lecture on several anatomy and medical aspects of it.<br>K1: audience received lecture on several anatomy and medical aspects of it and did conference.                                                                                                                                                                                                                                                                                                                                                                                                       | • 4 hours<br>• technology (H/Js)                                                                               | Knowledge, only one case.                                                                                                                                                                                                                                         |
| Simulation    | RCT          | Canada        | 4 arm (two traditional learning, 4 online) | 21           | N/A                   | Medicine              | G1: audience were based on the standard neonatal resuscitation course +<br>K1: audience had access to the standard neonatal educational programme + and additional virtual tool online access to the published a RCPSC Baby Check Learning Module.                                                                                                                                                                                                                                                                                                                                  | • 4 hours<br>• technology (H/Js)                                                                               | Skill a: Formative assessment of newborn examination skill on a standardized checklist.<br>Satisfaction: measured using a Likert 5-point questionnaire.                                                                                                           |
| Self-directed | RCT          | Self-directed | 4 arm (two traditional learning, 4 online) | 16           | Third year            | Medicine              | G1: audience received normal lecture (included a video demonstration) and access to a self-directed web-based learning module on anatomy created on K1.<br>K1: audience received a self-directed web-based learning module on anatomy created on K1.<br>K2: audience had access to a counselling through role play in small groups, one medical student acted as a teacher and another one acted as the digital tutor. K1 had no standardized case description.<br>K2: audience supervised interaction with real patient (counselling) and scenario with real patients who analyse. | • 4 hours<br>• computer, online access                                                                         | Knowledge, no MCQ.<br>Skill a: newborn CSCL.                                                                                                                                                                                                                      |
| Simulation    | RCT          | USA           | 4 arm (two traditional learning, 4 online) | 30           | Third year            | Medicine              | G1: audience received two PowerPoint™ presentation.<br>K1: audience had access web-based learning course.                                                                                                                                                                                                                                                                                                                                                                                                                                                                           | • 4 hours<br>• computer, online access and software for the web-based: SimSpace, Interactive Medical Software. | Knowledge, co-creation, coordination, case, formative, record on, case-based, all cases, question case to, diagnosis, the first test.                                                                                                                             |
| Simulation    | RCT          | Canada        | 4 arm (two traditional learning, 4 online) | 60           | H/A                   | Health care           | G1: audience received traditional methods of teaching and no access the intervention.<br>K1: audience in the course not only provided the traditional teaching, but also were given access to Virtual Cadavers (V-Cad) link.                                                                                                                                                                                                                                                                                                                                                        | • three H/Js<br>• computer, online access                                                                      | For knowledge and satisfaction, a software enabled to choose individual knowledge-based case and case record student satisfaction questionnaire was administered.                                                                                                 |
| Simulation    | RCT          | Canada        | 4 arm (two traditional learning, 4 online) | 100          | Second year           | Pharmacy              | G1: audience worked in small group workshop.<br>K1: audience used an Intranet-based tool for which they provided feedback concerning three as they related.                                                                                                                                                                                                                                                                                                                                                                                                                         | • 4 real cases<br>• computer and online access                                                                 | Skill a: cover cases, making their inference, but one analysis checklist.                                                                                                                                                                                         |

| STUDY ID      | Methods      |          |                                    | Participants |               |                       | Interventions                                                                                                                                                                                  |                                                                                                                                                    |                                                                                                                                                                                                                                                                                                                      |
|---------------|--------------|----------|------------------------------------|--------------|---------------|-----------------------|------------------------------------------------------------------------------------------------------------------------------------------------------------------------------------------------|----------------------------------------------------------------------------------------------------------------------------------------------------|----------------------------------------------------------------------------------------------------------------------------------------------------------------------------------------------------------------------------------------------------------------------------------------------------------------------|
|               | STUDY DESIGN | LOCATION | COMPARISON                         | TOTAL NUMBER | YEAR OF STUDY | HEALTHCARE SPECIALITY | CHARACTERISTICS                                                                                                                                                                                | TIME AND TECHNOLOGY                                                                                                                                | TEST /OUTCOMES                                                                                                                                                                                                                                                                                                       |
| Trincali 2011 | RCT          | USA      | eLearning vs. traditional learning | 94           | Fifty year    | Medicine              | CG: students received a PowerPoint presentation and video<br>IG: students received information through interactive multimedia slides, with external resources and 2 video cases with questions | <ul style="list-style-type: none"> <li>3 days before lecture until 1 day before OSCE</li> <li>computer (Java enabled) and online access</li> </ul> | Knowledge: 12 item multiple-choice test<br>Skills: OSCE<br>Attitude: a 12-item attitudes questionnaire with another 4-point scale 1 = strongly disagree, 2 = somewhat disagree, 3 = somewhat agree, 4 = strongly agree was used to assess students' feeling toward patients with substance abuse and their treatment |
| Wang 2009     | RCT          | China    | eLearning vs. traditional learning | 123          | Second year   | Nursing               | CG: students received a slideshow presentation<br>IG: students received an online based resource in which had to self learn the topic which also allowed online discussion                     | <ul style="list-style-type: none"> <li>time N/A</li> <li>computer and online access</li> </ul>                                                     | Knowledge: MCQ<br>Satisfaction: questionnaire                                                                                                                                                                                                                                                                        |
| Yeung 2012    | RCT          | UK       | eLearning vs. traditional learning | 78           | Second year   | Medicine              | CG: students received a text/image based document<br>IG: students received an online module with different views and an unlimited time allocation                                              | <ul style="list-style-type: none"> <li>time N/A</li> <li>computer and online access</li> </ul>                                                     | Knowledge: MCQ<br>Satisfaction: subjective questionnaire using a 5-point Likert scale                                                                                                                                                                                                                                |

CG: Control group

IG: Intervention group

\*Publication contained two studies

## 5: Risk of bias in included studies

In this section we will cover risk of bias for the 52 included parallel RCTs studies. Risk of bias for the eight included cluster RCTs will be presented separately in a consecutive section.

Thirty-one of the studies were considered to be of low quality because of high risk of bias. [1-30] Twenty-nine of the studies [31-46] had one or more categories classified as an unclear risk of bias, especially regarding the allocation of participants to intervention groups. There was only one study [47] with all the categories classified as low risk of bias - see Figure 2 (Risk of bias graph) and Figure 3 (Risk of bias for each individual parallel RCT separately).

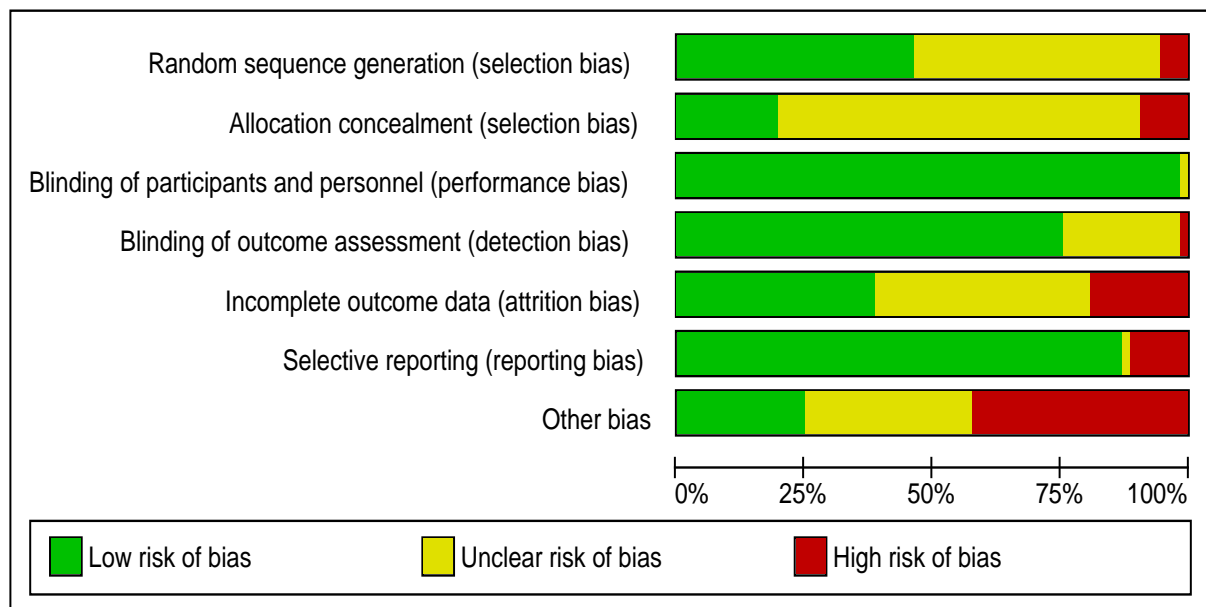

**Figure 2. Risk of bias graph**

|                         | Random sequence generation (selection bias) | Allocation concealment (selection bias) | Blinding of participants and personnel (performance bias) | Blinding of outcome assessment (detection bias) | Incomplete outcome data (attrition bias) | Selective reporting (reporting bias) | Other bias |
|-------------------------|---------------------------------------------|-----------------------------------------|-----------------------------------------------------------|-------------------------------------------------|------------------------------------------|--------------------------------------|------------|
| Ainsworth 2012a[83]     | +                                           | +                                       | +                                                         | +                                               | +                                        | +                                    | +          |
| Ainsworth 2012b[83]     | +                                           | +                                       | +                                                         | +                                               | +                                        | +                                    | ?          |
| Arroyo-Morales 2012[57] | +                                           | ?                                       | +                                                         | +                                               | +                                        | +                                    | +          |
| Beeckman 2008[79]       | +                                           | ?                                       | +                                                         | +                                               | +                                        | +                                    | ?          |
| Brettie 2013[53]        | +                                           | ?                                       | +                                                         | ?                                               | +                                        | +                                    | ?          |
| Buzzell 2002[54]        | ?                                           | ?                                       | +                                                         | +                                               | +                                        | +                                    | +          |
| Chao 2003[26]           | ?                                           | ?                                       | +                                                         | +                                               | +                                        | +                                    | ?          |
| Chen 2007[81]           | +                                           | +                                       | +                                                         | +                                               | ?                                        | +                                    | +          |
| C-Villanueva 2012[55]   | +                                           | ?                                       | +                                                         | +                                               | +                                        | +                                    | +          |
| Erickson 2003[30]       | +                                           | ?                                       | +                                                         | +                                               | +                                        | +                                    | ?          |
| Fernandez 2011[76]      | ?                                           | ?                                       | +                                                         | +                                               | +                                        | +                                    | +          |
| Fleming 2003[73]        | +                                           | ?                                       | +                                                         | ?                                               | +                                        | +                                    | ?          |
| Friedl 2006[32]         | ?                                           | ?                                       | +                                                         | +                                               | +                                        | +                                    | ?          |
| Frith 2003[74]          | ?                                           | +                                       | +                                                         | +                                               | +                                        | +                                    | +          |
| Gerdprasert 2011[33]    | ?                                           | ?                                       | +                                                         | ?                                               | +                                        | +                                    | ?          |
| Hauer 2009[34]          | ?                                           | ?                                       | +                                                         | ?                                               | +                                        | +                                    | +          |
| Jenkins 2008[78]        | +                                           | ?                                       | +                                                         | +                                               | +                                        | +                                    | ?          |
| Juliani 2011[25]        | +                                           | +                                       | +                                                         | +                                               | ?                                        | +                                    | +          |
| Kandasamy 2009[80]      | +                                           | +                                       | +                                                         | +                                               | +                                        | +                                    | ?          |
| Kerfoot 2008[35]        | ?                                           | ?                                       | +                                                         | +                                               | +                                        | +                                    | ?          |
| Kerfoot 2010[36]        | ?                                           | ?                                       | +                                                         | ?                                               | +                                        | +                                    | +          |
| Kornolpis 2002[37]      | ?                                           | ?                                       | +                                                         | +                                               | +                                        | +                                    | +          |
| Lee 2010[38]            | +                                           | ?                                       | +                                                         | +                                               | +                                        | +                                    | +          |
| Leong 2003[39]          | +                                           | ?                                       | +                                                         | ?                                               | +                                        | +                                    | +          |
| Lewis 2011[40]          | +                                           | +                                       | +                                                         | +                                               | ?                                        | +                                    | +          |
| Lipman 2001[41]         | ?                                           | ?                                       | +                                                         | +                                               | +                                        | +                                    | ?          |
| Maag 2004[43]           | ?                                           | ?                                       | +                                                         | +                                               | +                                        | +                                    | +          |
| Mahnken 2011[44]        | +                                           | +                                       | +                                                         | ?                                               | +                                        | +                                    | +          |
| Mattheos 2004[46]       | +                                           | ?                                       | +                                                         | +                                               | +                                        | +                                    | ?          |
| Nkenke 2012[47]         | ?                                           | ?                                       | ?                                                         | ?                                               | +                                        | +                                    | +          |
| Nkenke 2012a[48]        | +                                           | +                                       | +                                                         | +                                               | +                                        | +                                    | +          |
| Ochoa 2008[49]          | +                                           | +                                       | +                                                         | +                                               | ?                                        | +                                    | +          |
| Palmer 2008[50]         | ?                                           | ?                                       | +                                                         | ?                                               | ?                                        | +                                    | +          |
| Peroz 2009[51]          | ?                                           | ?                                       | +                                                         | +                                               | +                                        | +                                    | +          |
| Phadtare 2009[52]       | +                                           | +                                       | +                                                         | ?                                               | +                                        | +                                    | ?          |
| Raupach 2009[59]        | ?                                           | ?                                       | +                                                         | +                                               | +                                        | +                                    | +          |
| Raupach 2010[60]        | ?                                           | ?                                       | +                                                         | +                                               | +                                        | +                                    | +          |
| Ricks 2008[77]          | +                                           | ?                                       | +                                                         | +                                               | +                                        | ?                                    | +          |
| Romanov 2006[61]        | ?                                           | ?                                       | +                                                         | ?                                               | +                                        | +                                    | +          |
| Salas 2013[62]          | ?                                           | ?                                       | +                                                         | ?                                               | +                                        | +                                    | +          |
| Schillek 2005[63]       | ?                                           | ?                                       | +                                                         | ?                                               | +                                        | +                                    | +          |
| Smits 2012[64]          | +                                           | ?                                       | +                                                         | ?                                               | +                                        | +                                    | +          |
| Spickard 2002[65]       | +                                           | +                                       | +                                                         | ?                                               | +                                        | +                                    | +          |
| Spickard 2004[66]       | ?                                           | ?                                       | +                                                         | ?                                               | +                                        | +                                    | +          |
| Stain 2005[67]          | ?                                           | ?                                       | ?                                                         | ?                                               | ?                                        | +                                    | ?          |
| Stewart 2013[68]        | +                                           | +                                       | +                                                         | +                                               | ?                                        | +                                    | ?          |
| Stolz 2012[69]          | +                                           | ?                                       | +                                                         | ?                                               | ?                                        | +                                    | +          |
| Subramanian 2012[70]    | ?                                           | ?                                       | +                                                         | +                                               | +                                        | +                                    | ?          |
| Succar 2010[82]         | ?                                           | ?                                       | +                                                         | ?                                               | ?                                        | +                                    | +          |
| Truncali 2011[72]       | ?                                           | +                                       | ?                                                         | ?                                               | +                                        | +                                    | +          |
| Wang 2009[56]           | +                                           | ?                                       | +                                                         | +                                               | +                                        | +                                    | +          |
| Yeung 2012[75]          | +                                           | +                                       | +                                                         | ?                                               | +                                        | +                                    | +          |

**Figure 3. Risk of bias for each individual parallel RCT separately**

## Random sequence generation and allocation (selection bias)

Most studies (25 of the 52 studies, 48%) included little or no information about the *random sequence generation* and were therefore classified as having an unclear risk of bias. [1, 3, 8, 11, 12, 14, 18, 19, 22-24, 30, 31, 33, 35, 38, 40, 41, 43, 44, 47-50] Only three of the 52 studies (6%) had a high risk of bias for *random sequence generation*. One [7] of these studies generated the allocation sequence by assigning students to an odd or even number in the order with which they were entering the room. The other two studies violated the randomization plan by letting students choose between three alternative assignments freely [6] or by assigning students to the study groups in a consecutive way, i.e. based on the order in which they undertook a specific internship.[9] The Random sequence generation was classified as judged to result in a low risk of bias for 24 [2, 5, 10, 13-16, 20, 21, 25, 27-30, 32, 36, 37, 39, 42, 45, 46, 51, 52] of the 52 studies (46%).

The method used in the majority of the cases to generate a random number sequence was computer software [5, 13-16, 21, 25, 27-30, 37, 39, 46, 51, 52]. Furthermore, one study used name drawing, [2] two studies used a random number table [20, 45] and one other used “odd” and “even” conditions from a random number series.[39]

There was no information about the allocation concealment method in 37 [1, 3, 4, 6, 8, 11-14, 16-22, 26-28, 31-36, 38-42, 44-46, 50, 53] out of the 52 trials (73%) and therefore these studies were classified as having an unclear risk of allocation bias. Five studies (10%) had high risk of allocation bias. One of these studies [2] facilitated its randomization process by drawing the name inside the class room within the presence of all class members; and another study [23] posted their randomization result on the website four days before the lecture. The other three studies [7, 9, 24] reported having problems in their randomization procedures, which made the allocation concealment impossible. Ten studies (19%) had a low risk of bias for allocation concealment. Four [25, 29, 30, 52] of these studies generated the random numbers on a computer and delivered them in a way that ensured concealment of allocation. Two studies from the same paper used the centralized randomization process.[15] The remaining four studies [10, 15, 36, 37, 42] used opaque envelopes for concealment.

## Blinding (performance bias and detection bias)

The risk of bias assessment for blinding of participants and personnel focused only on the knowledge and skills outcomes. The risk of bias was classified as low for all but one study,[47] even though blinding of participants and personnel was not possible in any of these studies because of the nature of the intervention. The only study considered to have a high risk of bias related to blinding of participants and personnel [47] did not report any outcome on knowledge or skill. Our overall assessment for the performance bias was based on the fact that only the 43 studies investigating knowledge [2, 3, 5-12, 15-17, 20-23, 25-30, 32, 33, 35-40, 42, 44-46, 50, 53-58] and the 11 studies [1, 3, 6, 13, 14, 16, 21, 23, 32, 33, 52] measuring skills had an objective outcome assessment. Therefore, the assessment was considered impervious to the student's opinion about the teaching method. As indicated before, subjective outcomes such as attitudes and student satisfaction were not included in the risk of bias assessment for *blinding of participants and personnel*. These outcomes are more prone to performance bias when participants aren't blinded due to their subjective nature and also focusing on attitudes and student satisfaction would therefore have resulted in a high risk of bias in all studies.

Thirty-nine of the 52 included parallel RCTs (75%) were considered to be at low risk of bias for the *blinding of outcome assessment*. The risk of bias was considered low risk not only in studies where all outcome assessors were blinded [8, 14, 15, 19, 32, 42, 43, 50, 52] but also in studies with unblinded assessors as long as the method of outcome assessment included no element of interpretation and a classification of a result could be done unambiguously [2, 4, 5, 7, 9, 10, 12, 17, 18, 22, 24-29, 31, 33-36, 38-41, 45, 46, 53], e.g. the only assessment was a multiple choice test. Twelve studies (22%) were rated as having an unclear risk of bias due to the lack of information about blinding of the outcome assessors [1, 3, 6, 11, 13, 16, 20, 21, 23, 36, 37, 44]. Only one study [30] had high risk for detection bias because it reported a mixed knowledge outcome for which a part of the result was considered unblinded.

### **Incomplete outcome data (attrition bias)**

As a consequence of the fact that none of the students were blinded there is a high risk of attrition bias for any outcome that relies on active participation of students for follow-up (e.g. answering a questionnaire on attitudes and satisfaction and taking a knowledge test).

A substantial number (10 out of 42, 19%) of the studies did not report complete outcome data (e.g. only reported the mean test score but did not report the number of students who were analysed) or had differential drop-out rates in the different intervention groups and were classified as high risk of bias. Two of high risk of bias studies (4%) showed a difference in the attrition/exclusion rates between the experimental groups. [1, 29] Five studies (12%) that were classified as having a high risk of bias had missing/unreported data and did not account for or comment on that. [13, 20, 23, 24, 28] The remaining three studies reported inconsistent sample sizes.[8, 22, 26] Twenty (38%) studies were classified as having a low risk of bias for incomplete outcome data. [3, 5, 6, 15-17, 27, 31-36, 40, 43, 46, 47, 50, 51] These studies reported whether attrition and exclusion had occurred. The information provided regarding the reason for not analysing all participants was either similar for the groups being compared and/or showed only a small and statistically insignificant difference between the studies.

Because details of attrition and exclusion were not reported, 22 studies (42%) were classified as having an unclear risk of bias for *incomplete outcome data* [2, 4, 7, 9-12, 14, 18, 19, 21, 25, 28, 38, 39, 41, 42, 44, 45, 52, 53] In these studies it was not clear if there was any level of attrition among the experimental groups at all.

### **Selective reporting (reporting bias)**

The majority of studies (45 out of 52, 87%) were rated as having a low risk of selective reporting bias [1, 4-14, 16-23, 25, 26, 28-47, 50-52]. The assessment of selective reporting bias required the authors to report results for all outcomes mentioned in the methods sections of the published articles; protocols were not available to our reviewers. Only one study (54) (5%) was rated as having unclear risk of selective reporting bias because the authors presented more results than the outcomes mentioned in the method section. Six out of the 52 studies (12%) were rated as having a high risk of selective reporting bias. Four of these studies [2, 3, 24, 53] did not report the results in full, making it impossible to get separate results for each group. Two studies presented in the same article extended their study period to have a long-term outcome.[15]

## Other potential sources of bias

Volunteer bias is an important and sometimes almost inevitable problem in studies assessing different ways of learning. Therefore, volunteer bias resulted in a high risk of bias classification in 16 of the 52 included studies (31%) [5-7, 10, 12, 14-17, 19, 23-27, 30] It was unclear whether volunteer bias was a problem in 15 of the 52 studies (29%) and therefore they were classified as having an unclear risk of bias. [3, 13, 21, 22, 28, 29, 31-33, 37, 44-46, 51, 52] Among them, nine of the studies did not provide information for the recruitment process [3, 21, 22, 31-33, 44, 45, 51], while six studies [13, 28, 29, 37, 46, 52] approached all the students but not all of them agreed to participate in the trial. Twenty studies (39%) recruited or approached entire class rooms or the entire year and were therefore at low risk of volunteer bias. [1, 2, 4, 8, 9, 11, 18, 20, 34-36, 38-43, 47, 50, 53]

We classified six more studies (12%) as having a high risk of other potential sources of bias. [1, 2, 4, 11, 13, 18, 21] Two studies suffered from imbalanced experimental groups where more material or information was given in one group compared to the other. In one study the web-based intervention group was not exposed to comparable knowledge/skills [21] as was the control group. In another study [18] the experimental groups were not provided with equivalent academic education because the students in the control group were provided only with facts that were taken from a website that is accessible to the general population. Contamination (i.e. the control group was also exposed to the eLearning intervention) was also a concern in one study (6%), which was categorised as having a high risk of bias.[11] However, it is possible that contamination occurred in several of the other included trials as it is likely that students shared material with course mates who were randomised to a different group. Three studies were rated as having a high risk of other bias because one study used a historical control group,[1] one allowed some of the students to hand in their assessment, a schedule, in person rather than electronically,[2] while another study reported that authors had a conflict of interest with spaced education.[4]

We classified *other bias* as high risk of bias if one of the elements assessed was of high risk even when other elements were rated as having an unclear or low risk of bias. For example, if there was a high risk of volunteer bias but an unclear risk for using comparable learning interventions between experimental groups we would classify it as having a high risk of bias. Please refer to Figure 3 for the assessment per study.

## Risk of bias in cluster RCTs

Eight studies included in our review were cluster RCTs. [54-61] In these studies one or more risk of bias items were categorised as high risk of bias. Therefore, the methods and analyses employed in these cluster RCTs were generally not judged to be of high quality.

Recruitment bias was not addressed in two [58, 59] of the eight included studies. Two other studies were assessed as high risk for recruitment bias because they applied the randomization process before recruiting the participants. [55, 56] The remaining studies [54, 57, 60, 61] that were judged to be of low risk of recruitment bias had provided sufficient information on the participant flow and randomization process.

Baseline characteristics differed between the intervention and control group in two studies. [60, 61] In three other studies there was a difference in educational level, primary care clerkships or academic grades for the previous semester at baseline. These imbalances were judged to be of high risk of affecting the outcome [55, 58] or confirmed to have modified the effect.[59] Three studies [54, 56, 57] provided no information on baseline characteristics and whether these were different between the groups.

None of the studies reported loss of entire clusters. However, three studies [55, 57, 61] reported loss of individual participants and three additional studies had a high [60] or imbalanced [58] drop-out rate or reported inconsistent numbers,[54] all of which resulted in a high-risk of bias classification. One study reported attrition in both groups but was judged as having an unclear risk of loss of clusters for providing no further information.[59] One study [56] reported attrition but was judged to be of low risk of bias as the attrition was limited and could not have affected the results.

The data analysis of two studies [56, 60] accounted for the cluster unit. The rest of the cluster RCT studies [14, 54, 55, 57, 61, 62] suffered from unit of analysis error (i.e. incorrectly analysed participants as independent individuals rather than the unit they were randomized in). Therefore there is a high risk of false positive conclusions in these studies.

It was unclear whether or not volunteer bias had occurred in two studies. [54, 58] The remaining six studies [55-57, 59] were all categorised as having a low risk of volunteer bias.
